# Supplementary material for: Seed priming enhances seed germination and plant growth in four neglected cultivars of Capsicum annuum L.
Source: PeerJ journal article supplement (doi:10.7717/peerj.18293), 2024-10-28
Supplement: Figure_S1.pdf [file Figure_S1.pdf]

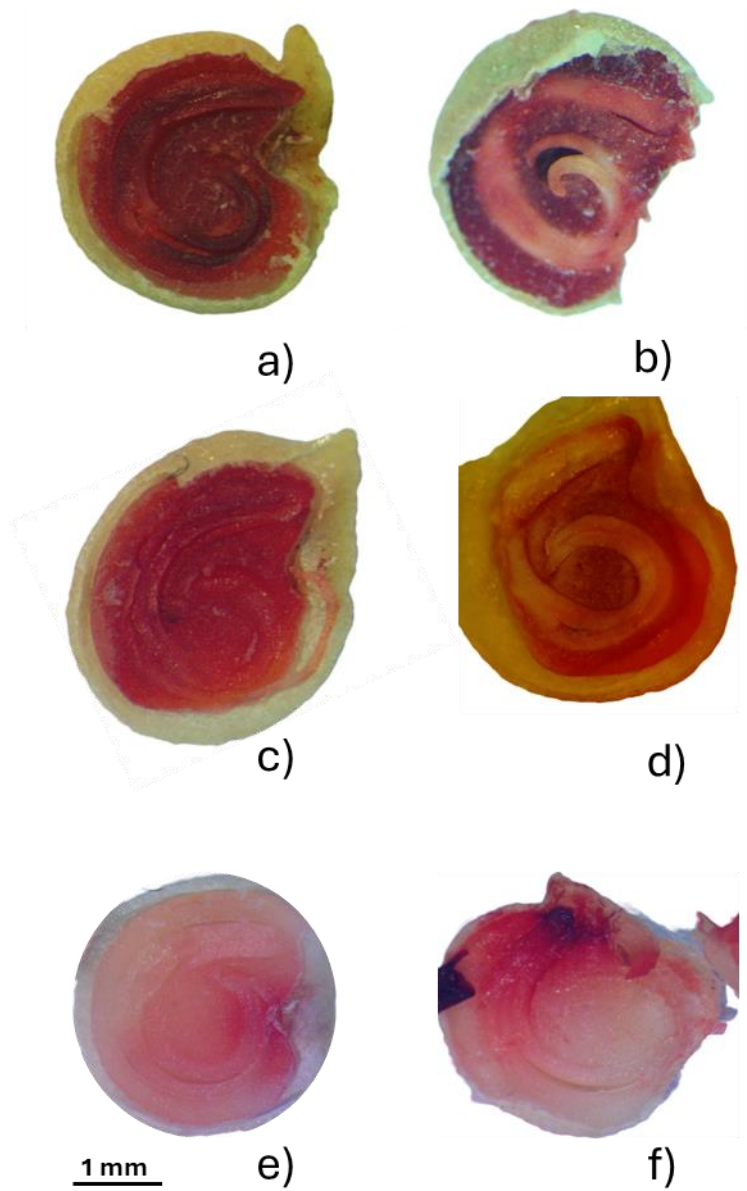

Figure S1. Pepper seeds (cut in half) stained by tetrazolium solution: *a,b*) Control seeds, *a*) viable and vigorous, *b*) viable non-vigorous; *c,d*) Priming with  $\text{KNO}_3$  6% 96h, *c*) viable and vigorous, *d*) viable non-vigorous; *e,f*) Acid priming with HCl at two different times, *e*) 5' non-viable; *f*) 10' non-viable.
